# Supplementary material for: Chemical-Free Technique to Study the Ultrastructure of Primary Cilium
Source: PubMed Central journal article supplement (PMC4629161; doi:10.1038/srep15982), 2015-11-02

# **Chemical-Free Technique to Study the Ultrastructure of Primary Cilium**

**Ashraf M. Mohieldin, Wissam A. AbouAlaiwi, Min Gao, Surya M. Nauli**

Department of Biomedical & Pharmaceutical Sciences, Chapman University School of Pharmacy,  
Irvine, CA 92618

Department of Urology, University of California at Irvine Medical Campus, Orange, CA 92868

Department of Medicinal & Biological Chemistry, University of Toledo School of Pharmacy,  
Toledo, OH 43614

Liquid Crystal Institute, Kent State University, Kent, OH 44242.

## Corresponding:

Surya M. Nauli

Chapman University, School of Pharmacy

University of California at Irvine, Urology

9401 Jeronimo Road

Irvine, CA 92618-1908

Tel: 714-516-5485

Fax: 714-516-5481

Email: [nauli@chapman.edu](mailto:nauli@chapman.edu)

Email: [snauli@uci.edu](mailto:snauli@uci.edu)

## **Supplemental Figure 1**

**The following 6 HPF/FFTEM micrographs show the presence of primary cilia. Cilia were pseudocolored in green.**

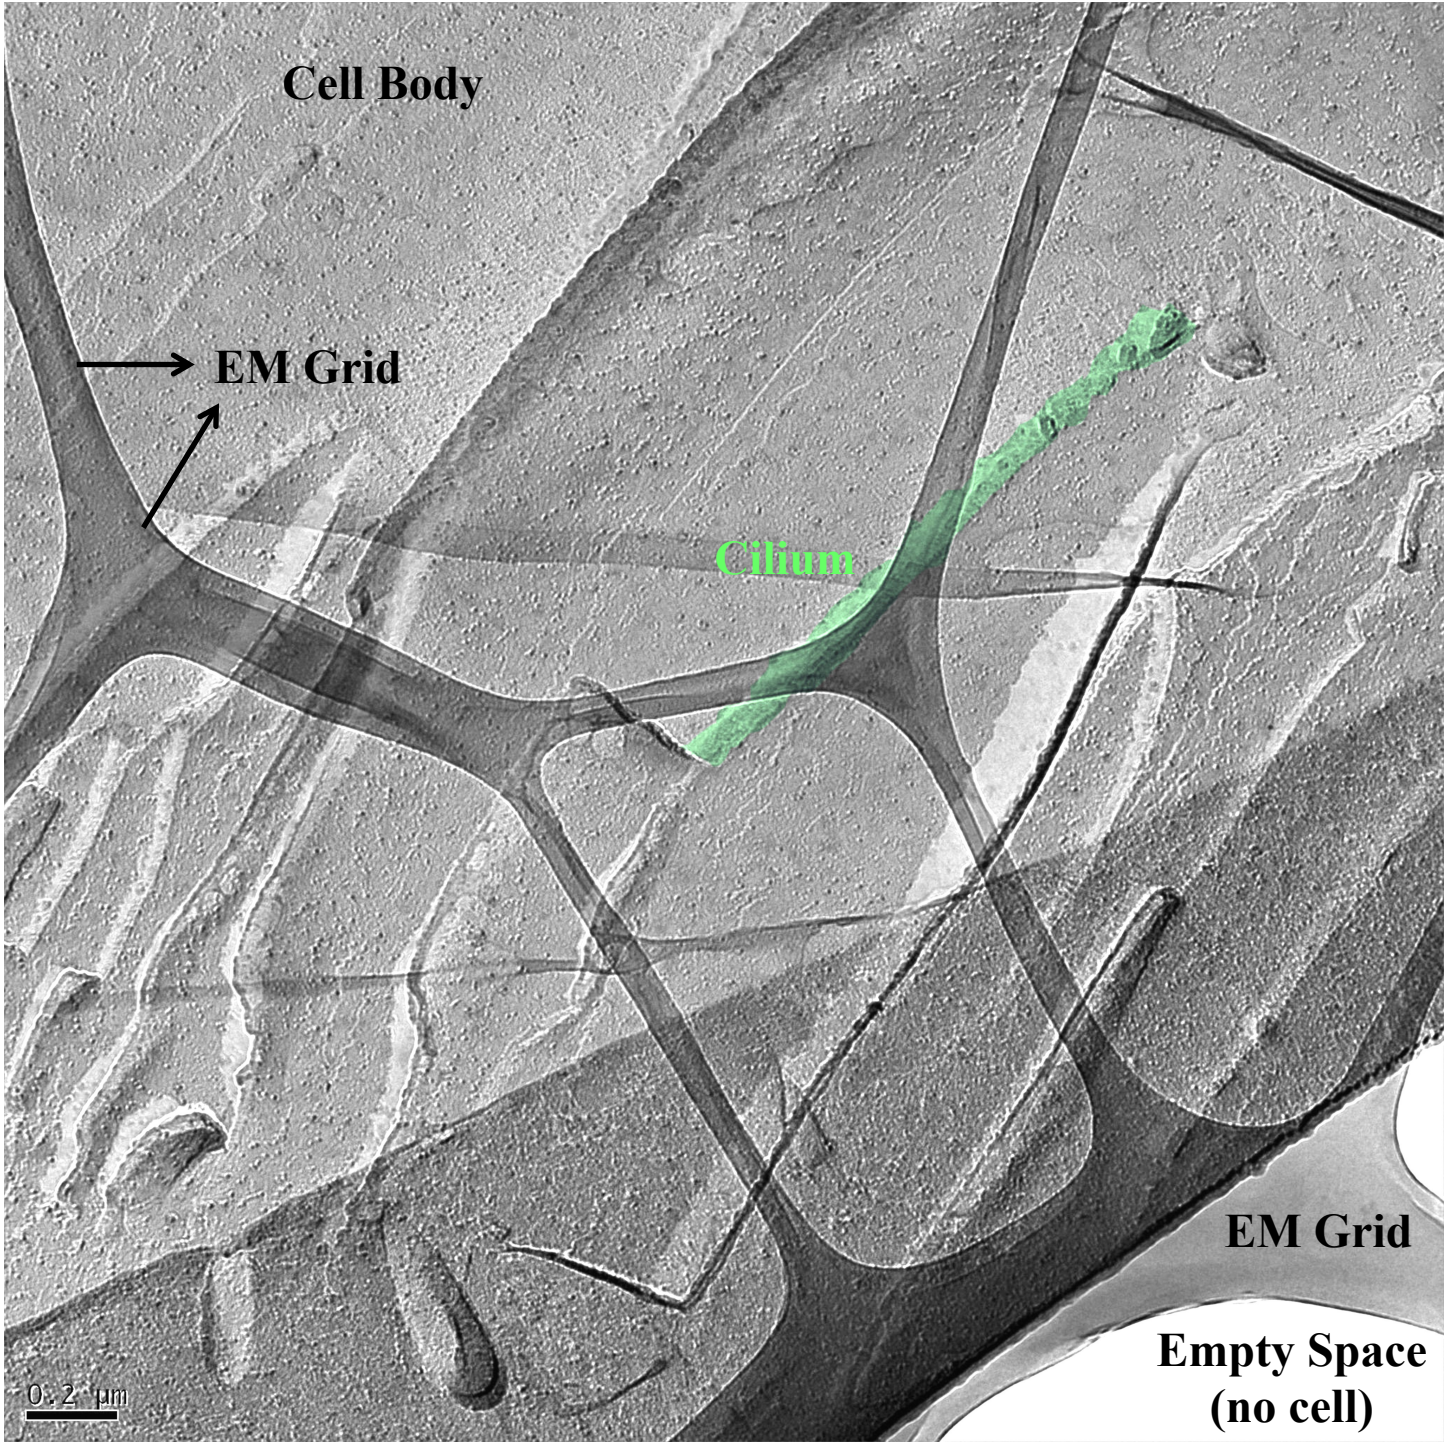

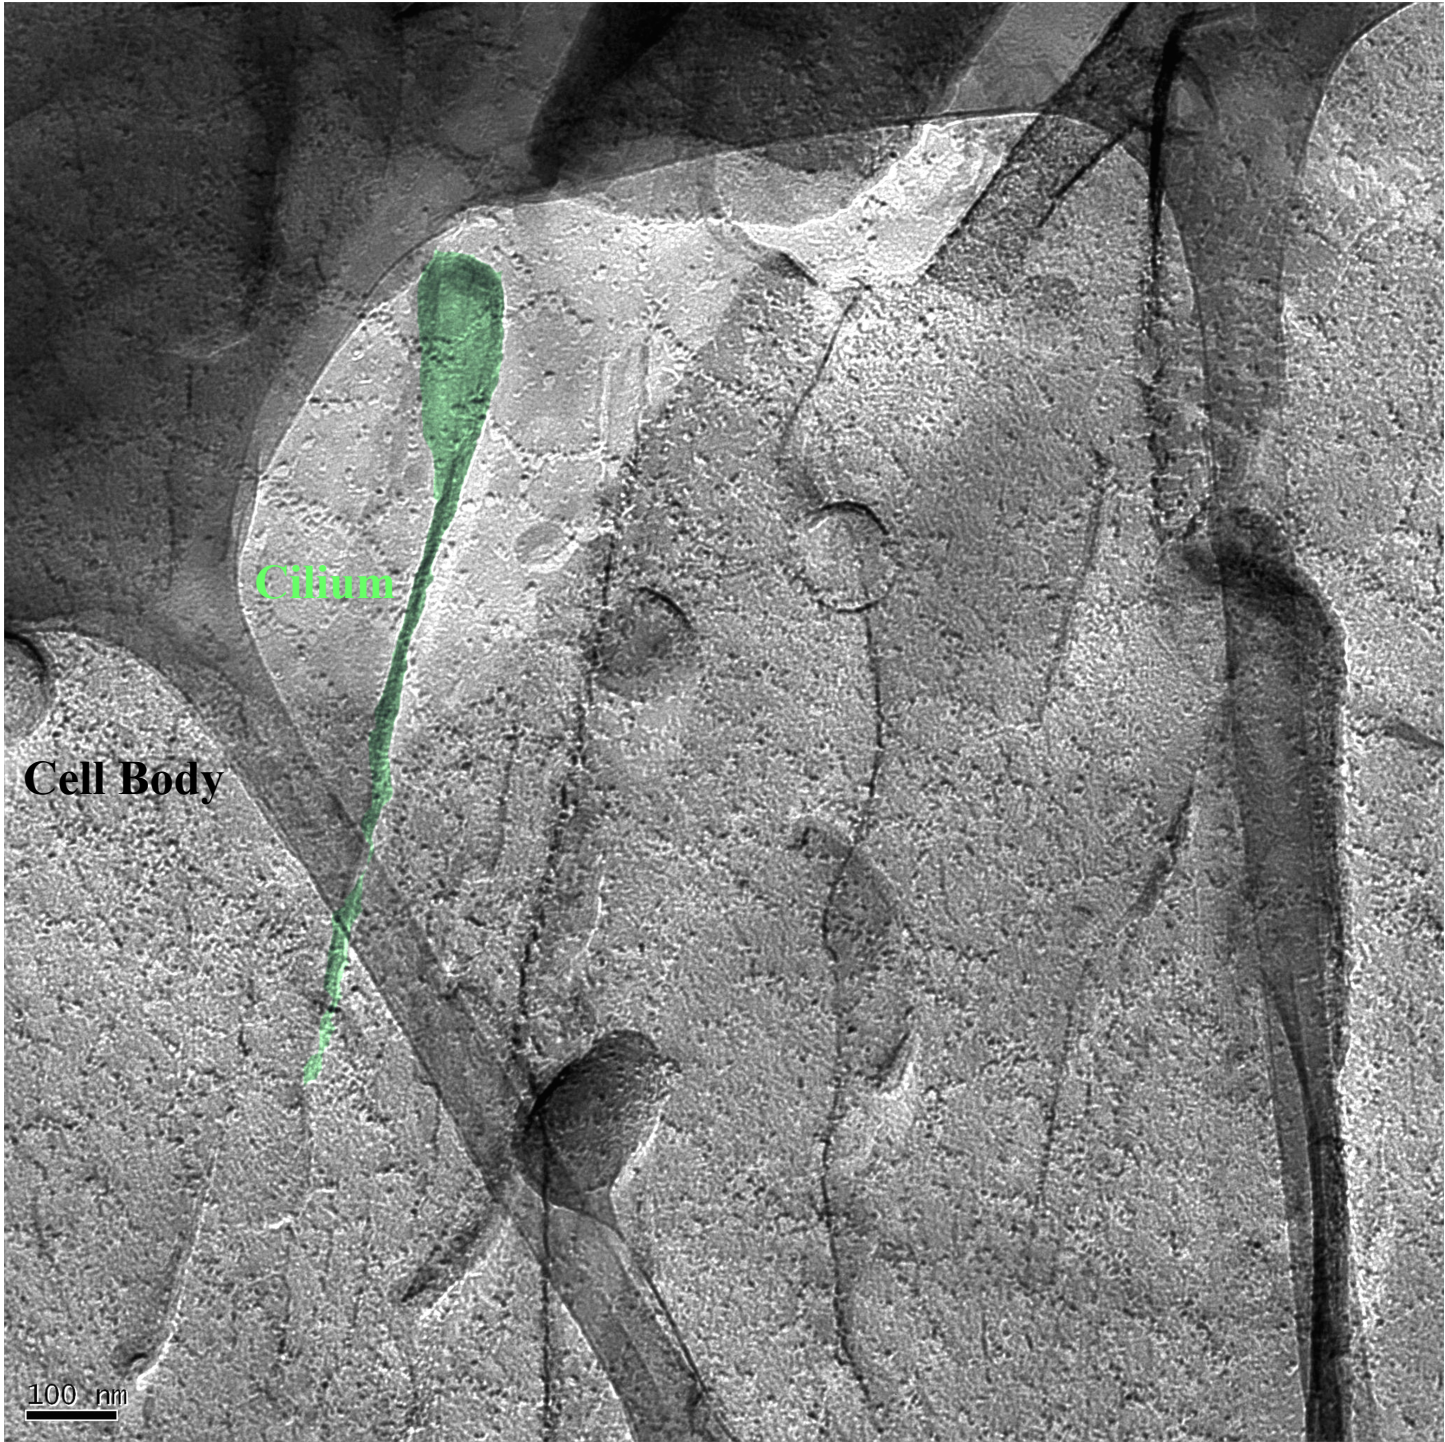

**Cell Body**

**Cilium**

100 nm

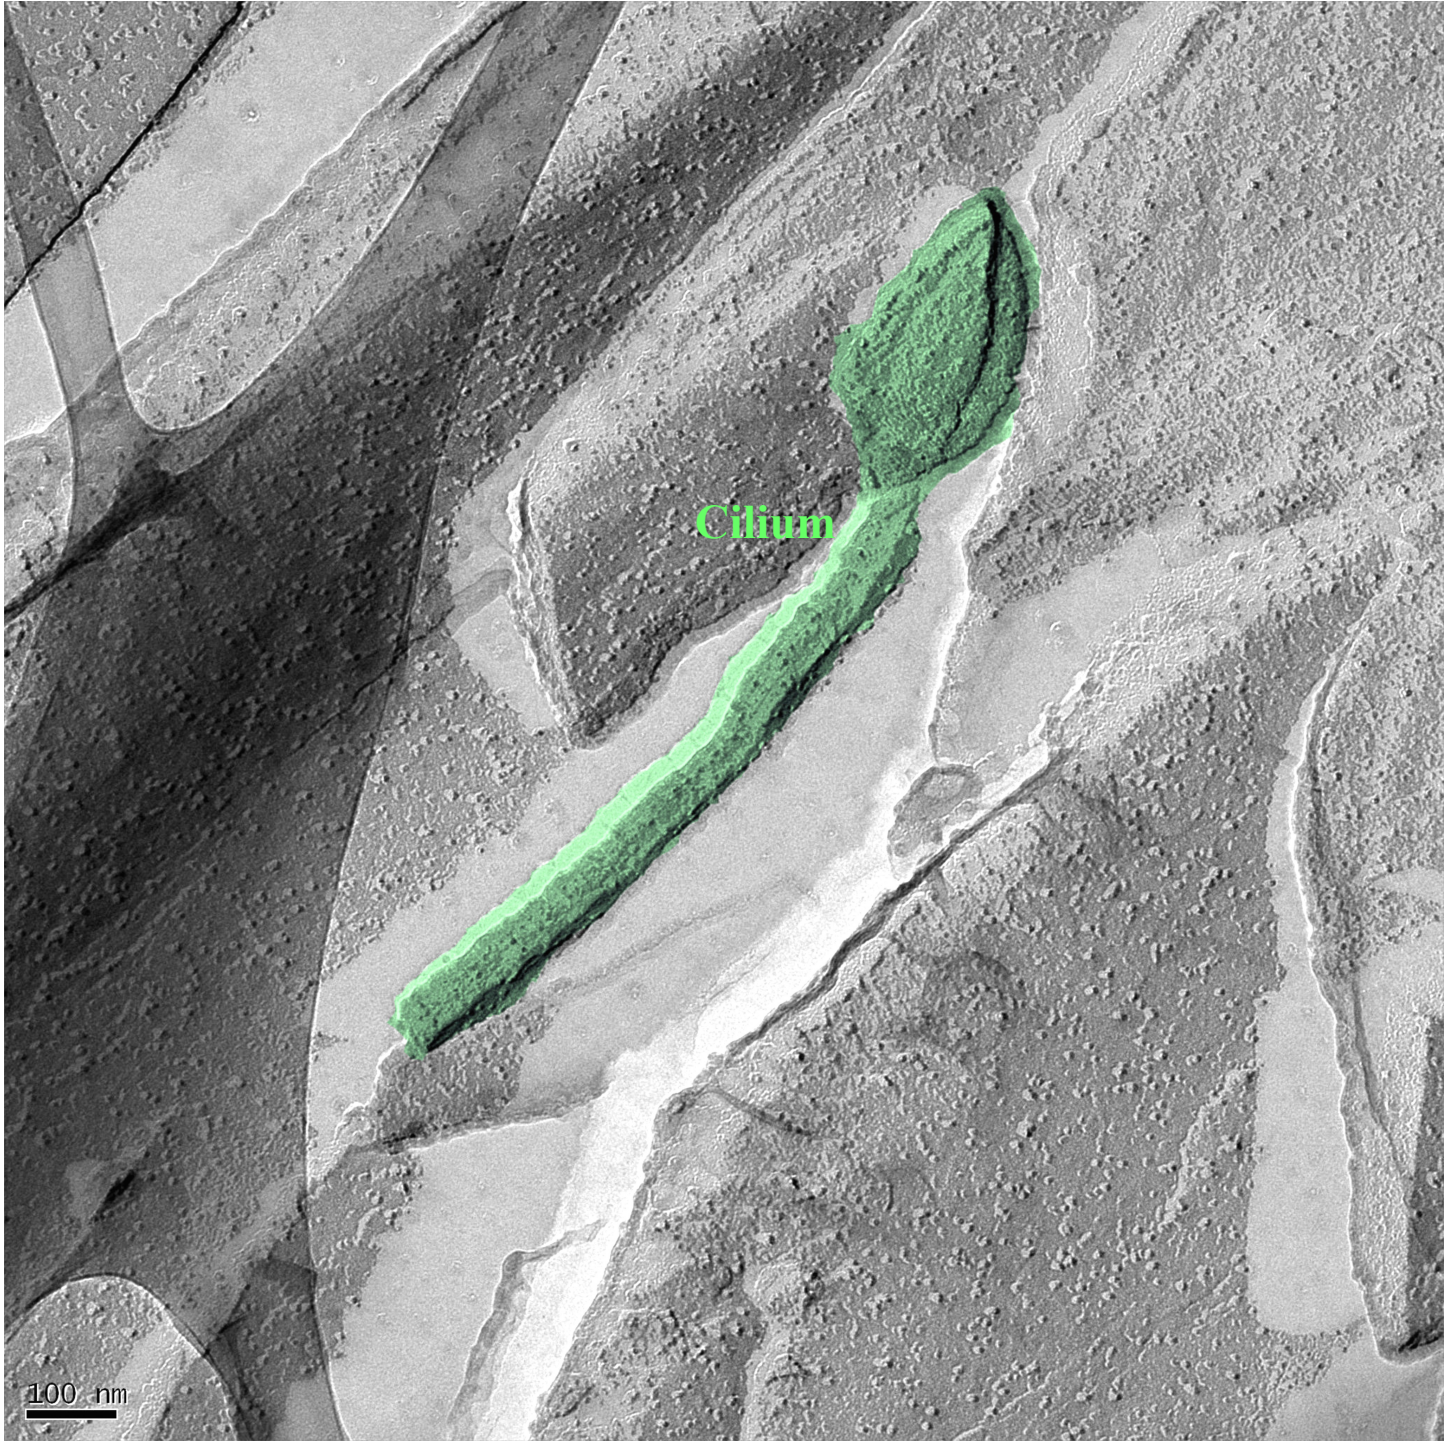

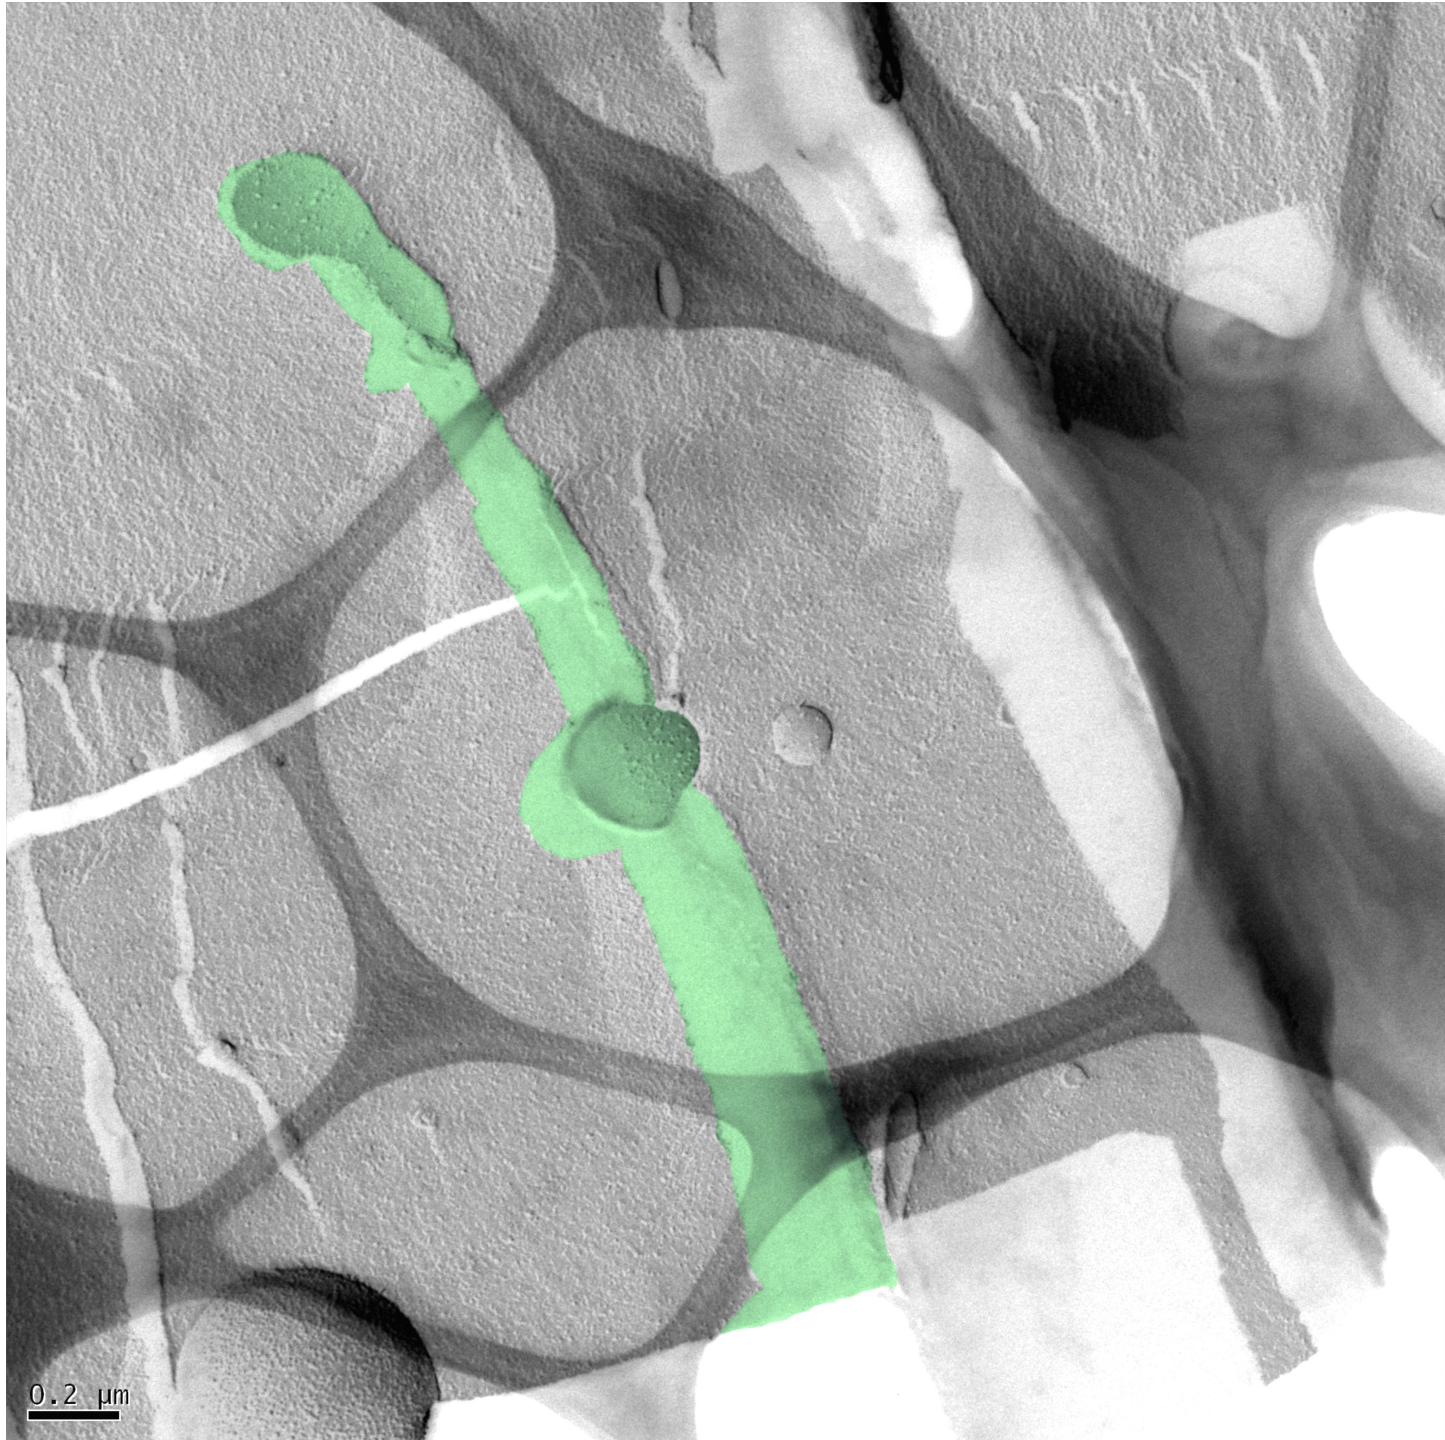

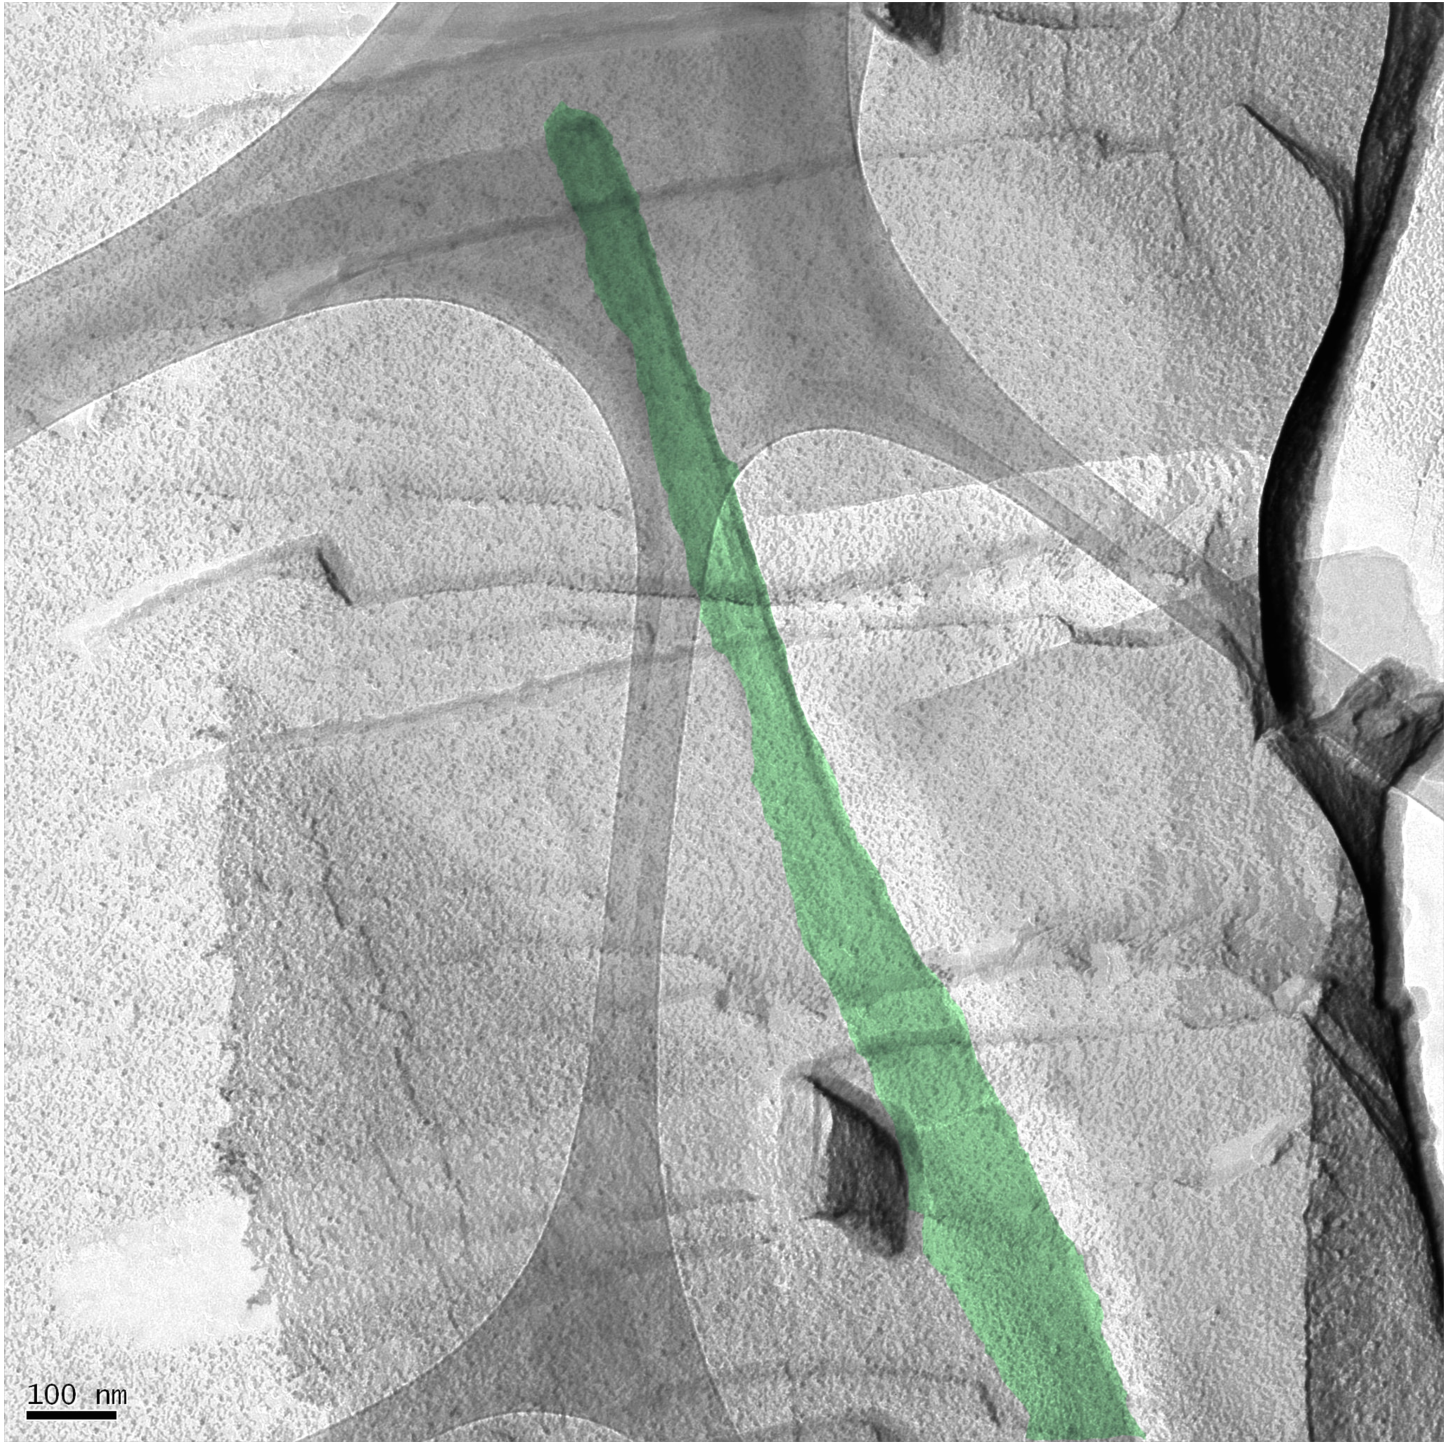

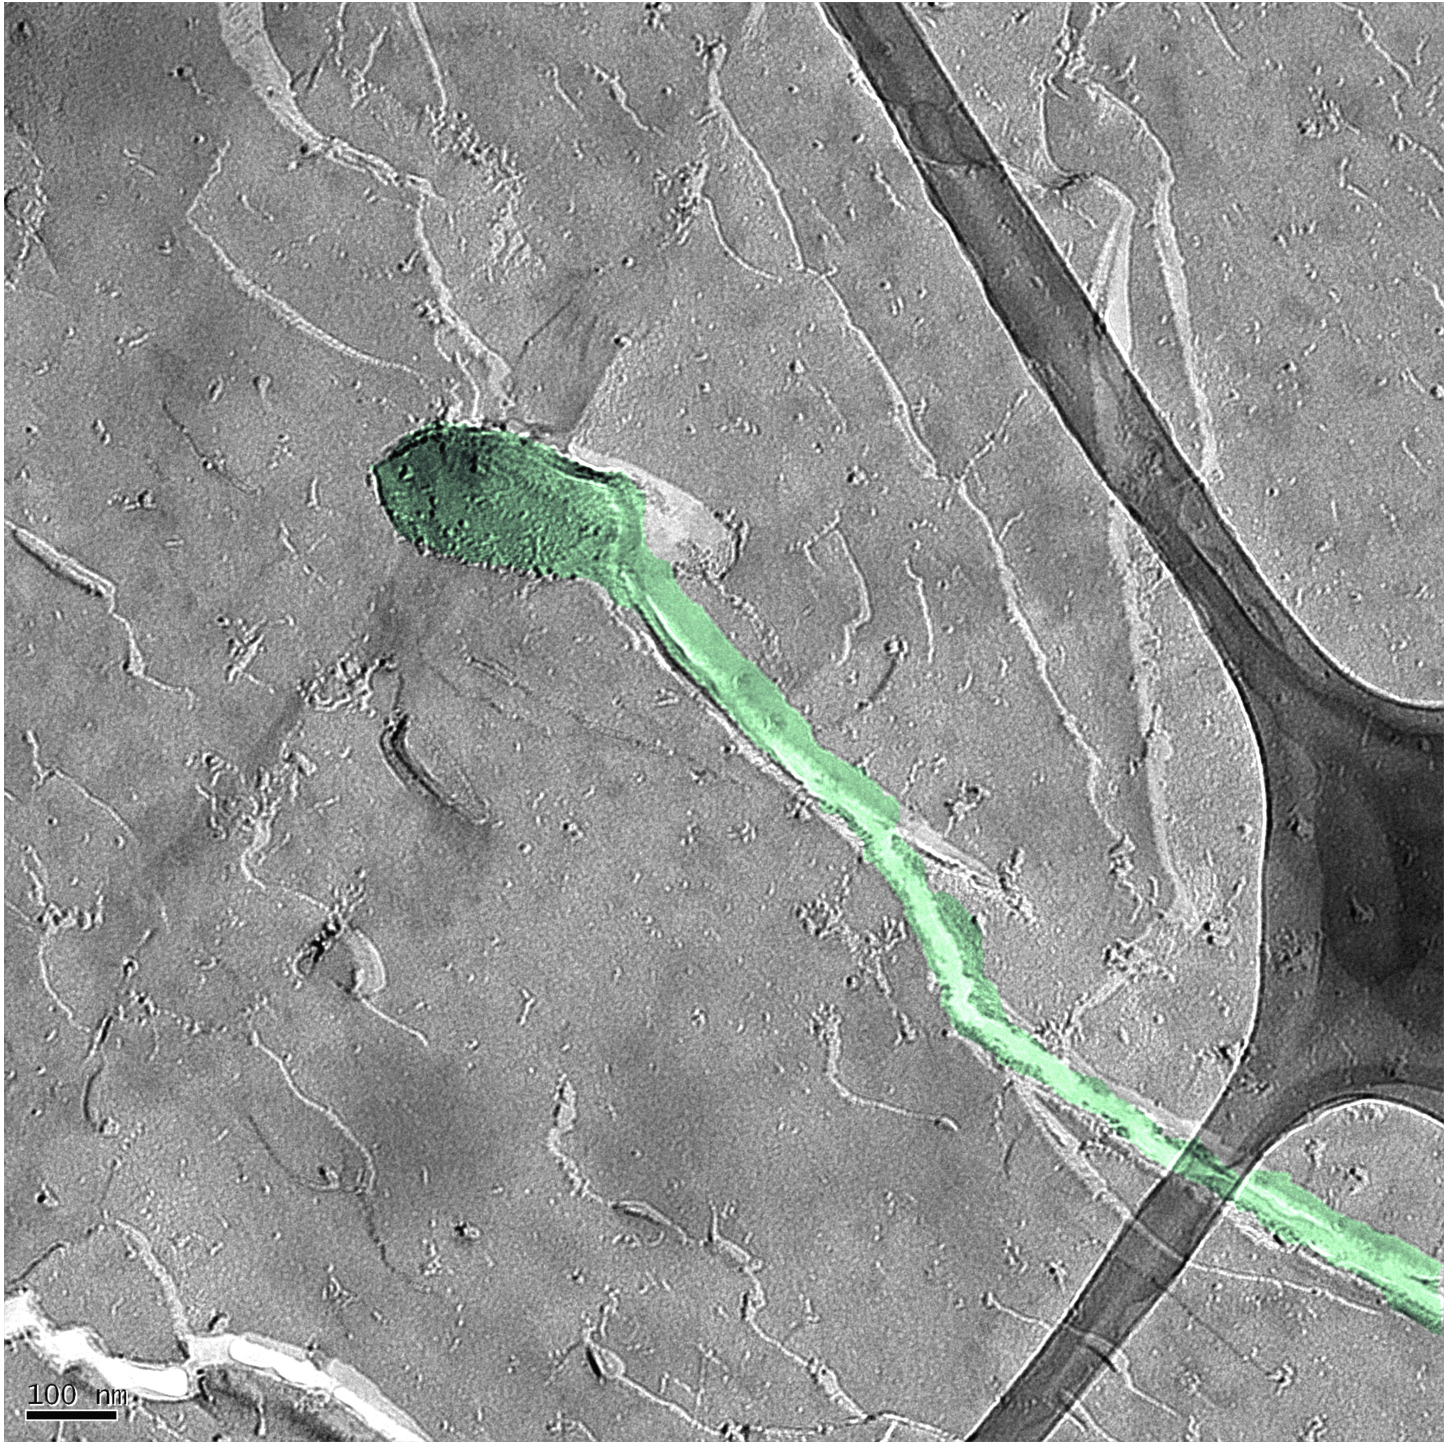



## **Supplemental Figure 2**

**The following 6 HPF/FFTEM micrographs show the representative images in which primary cilia are not observed.**

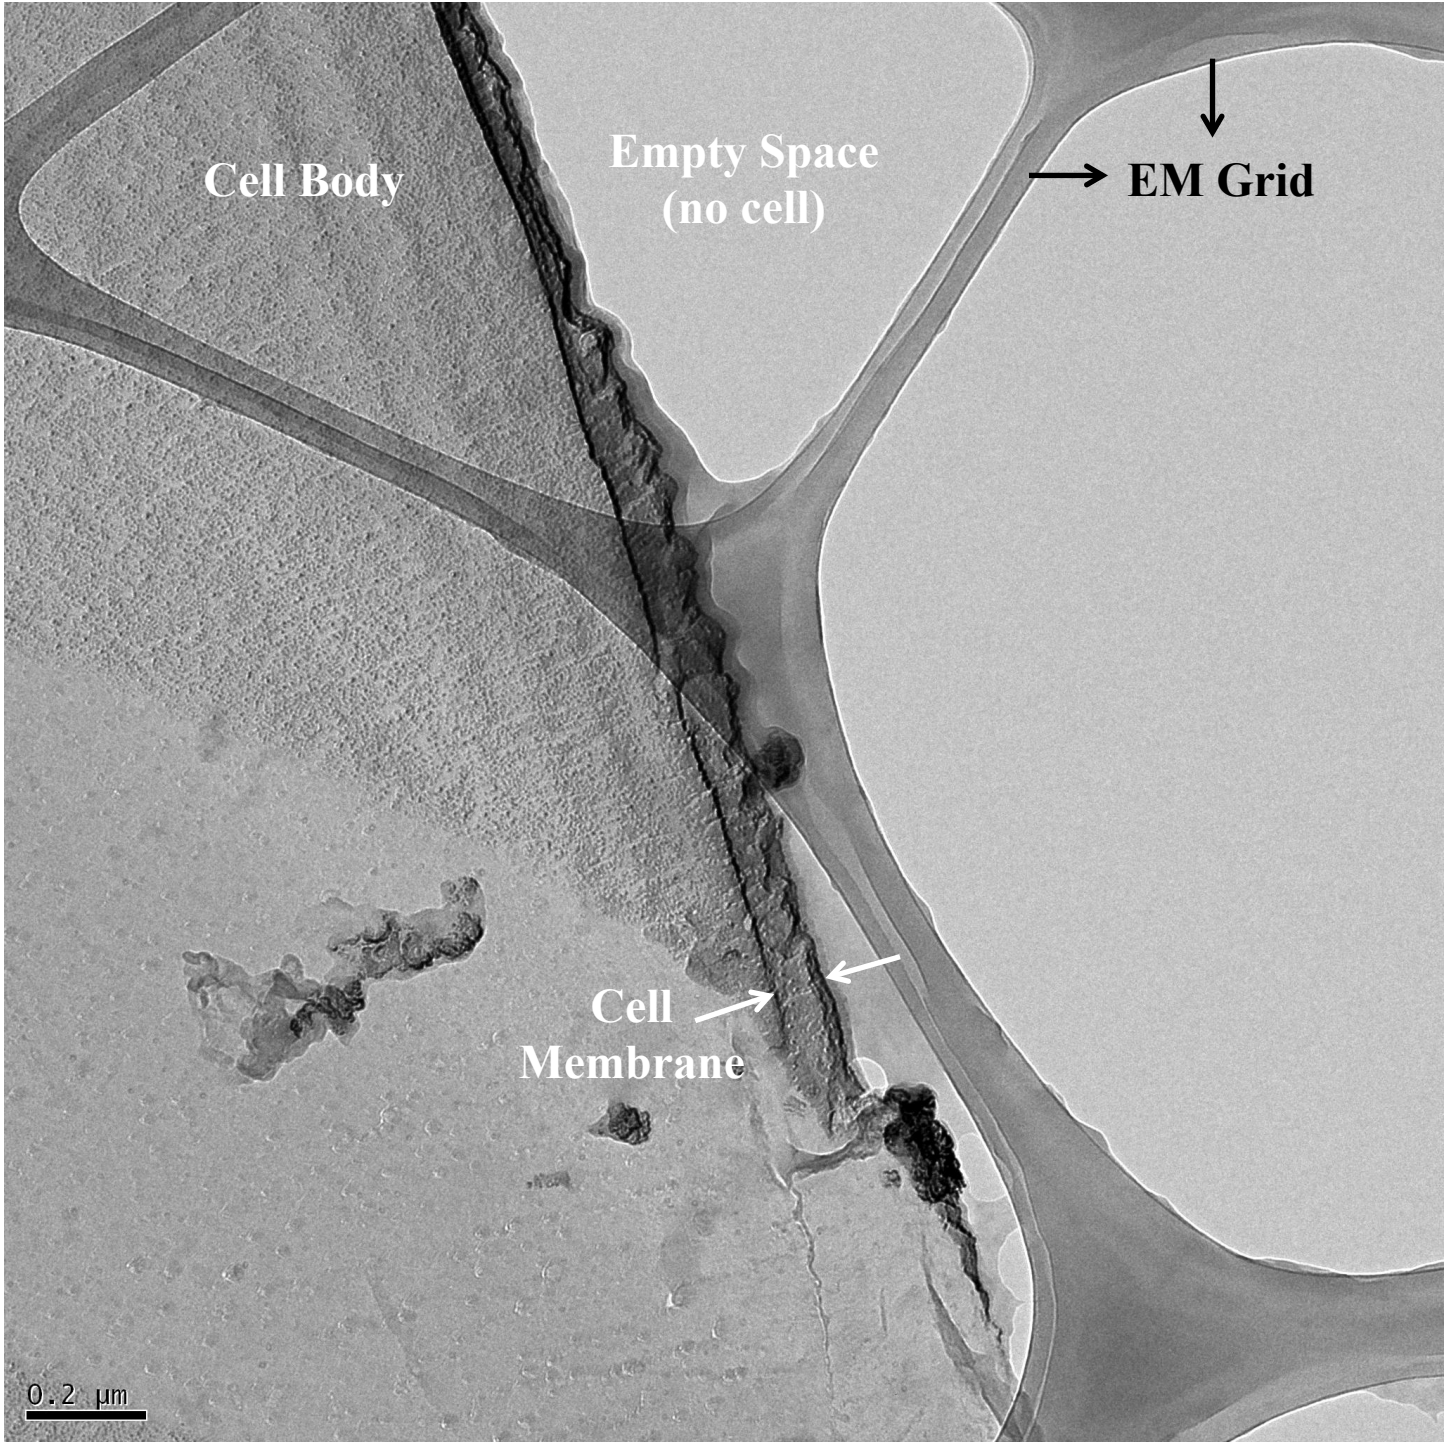

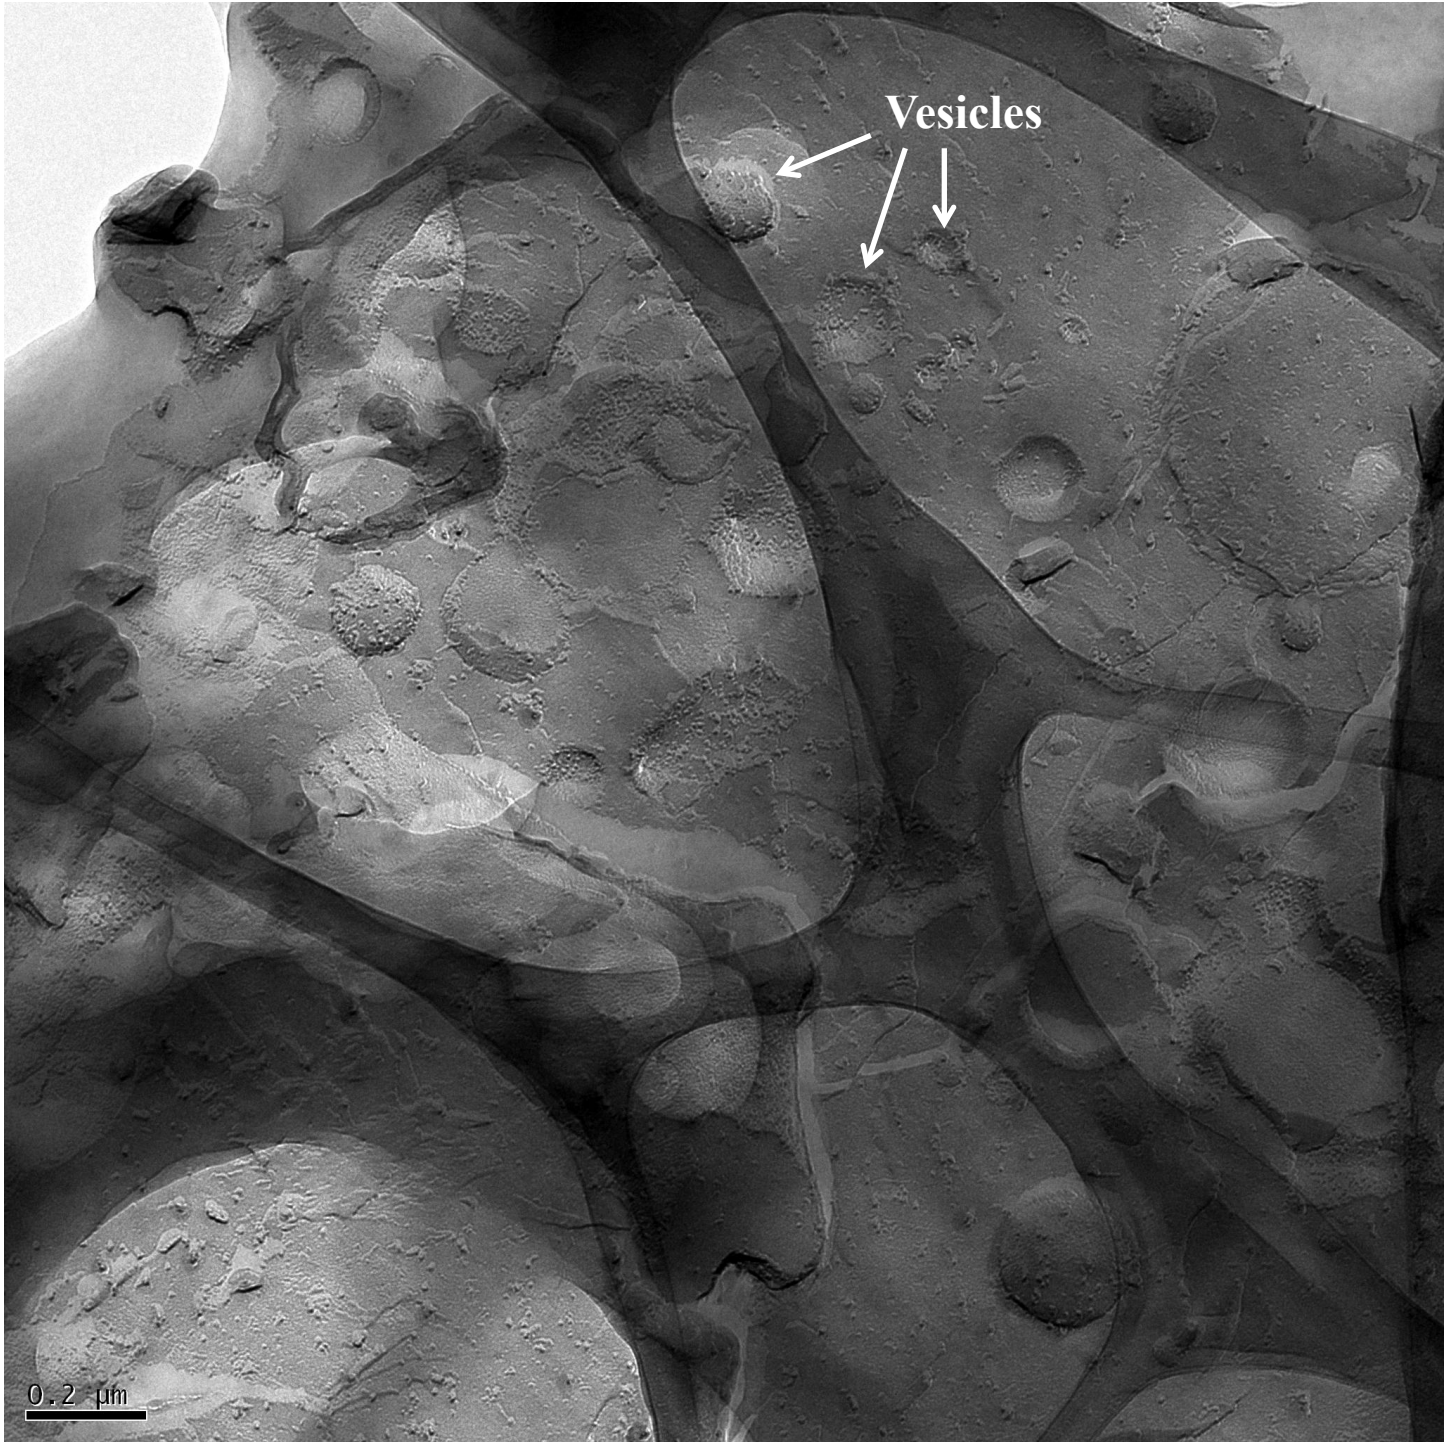

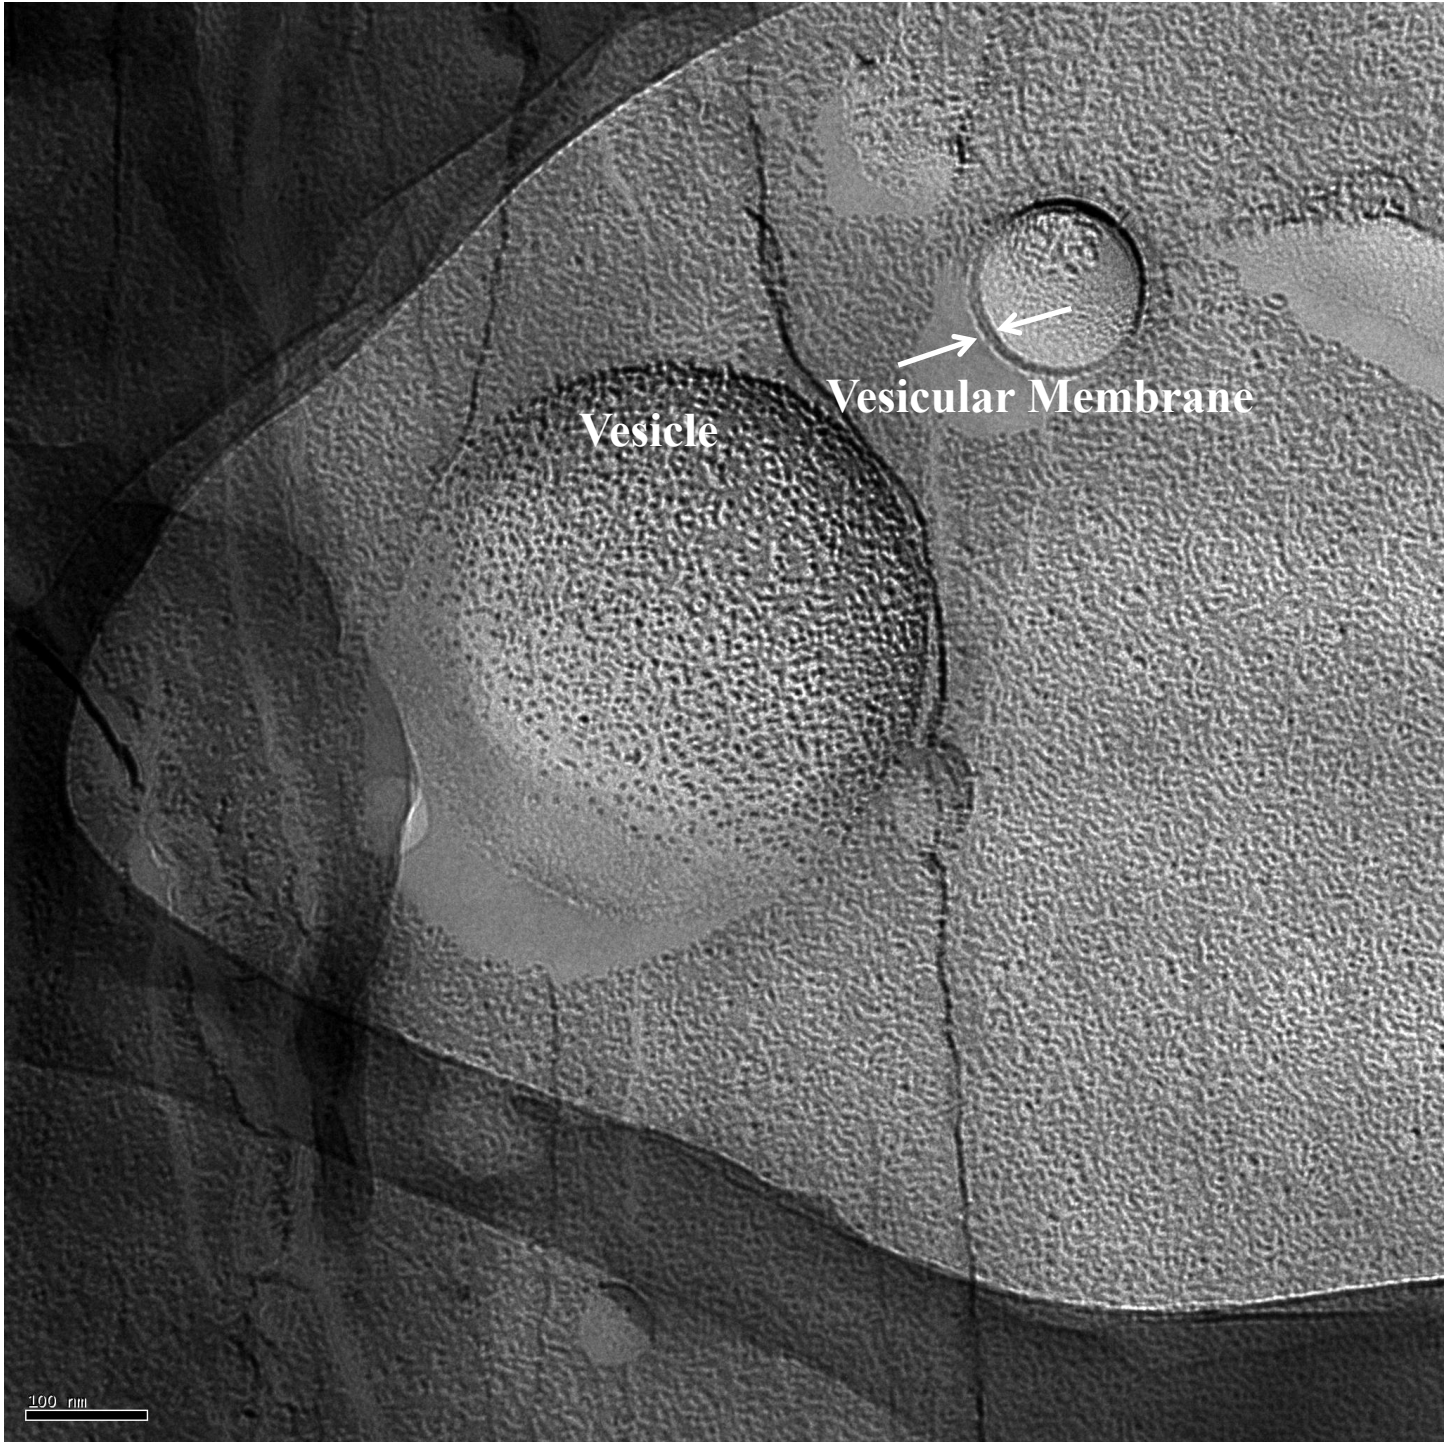

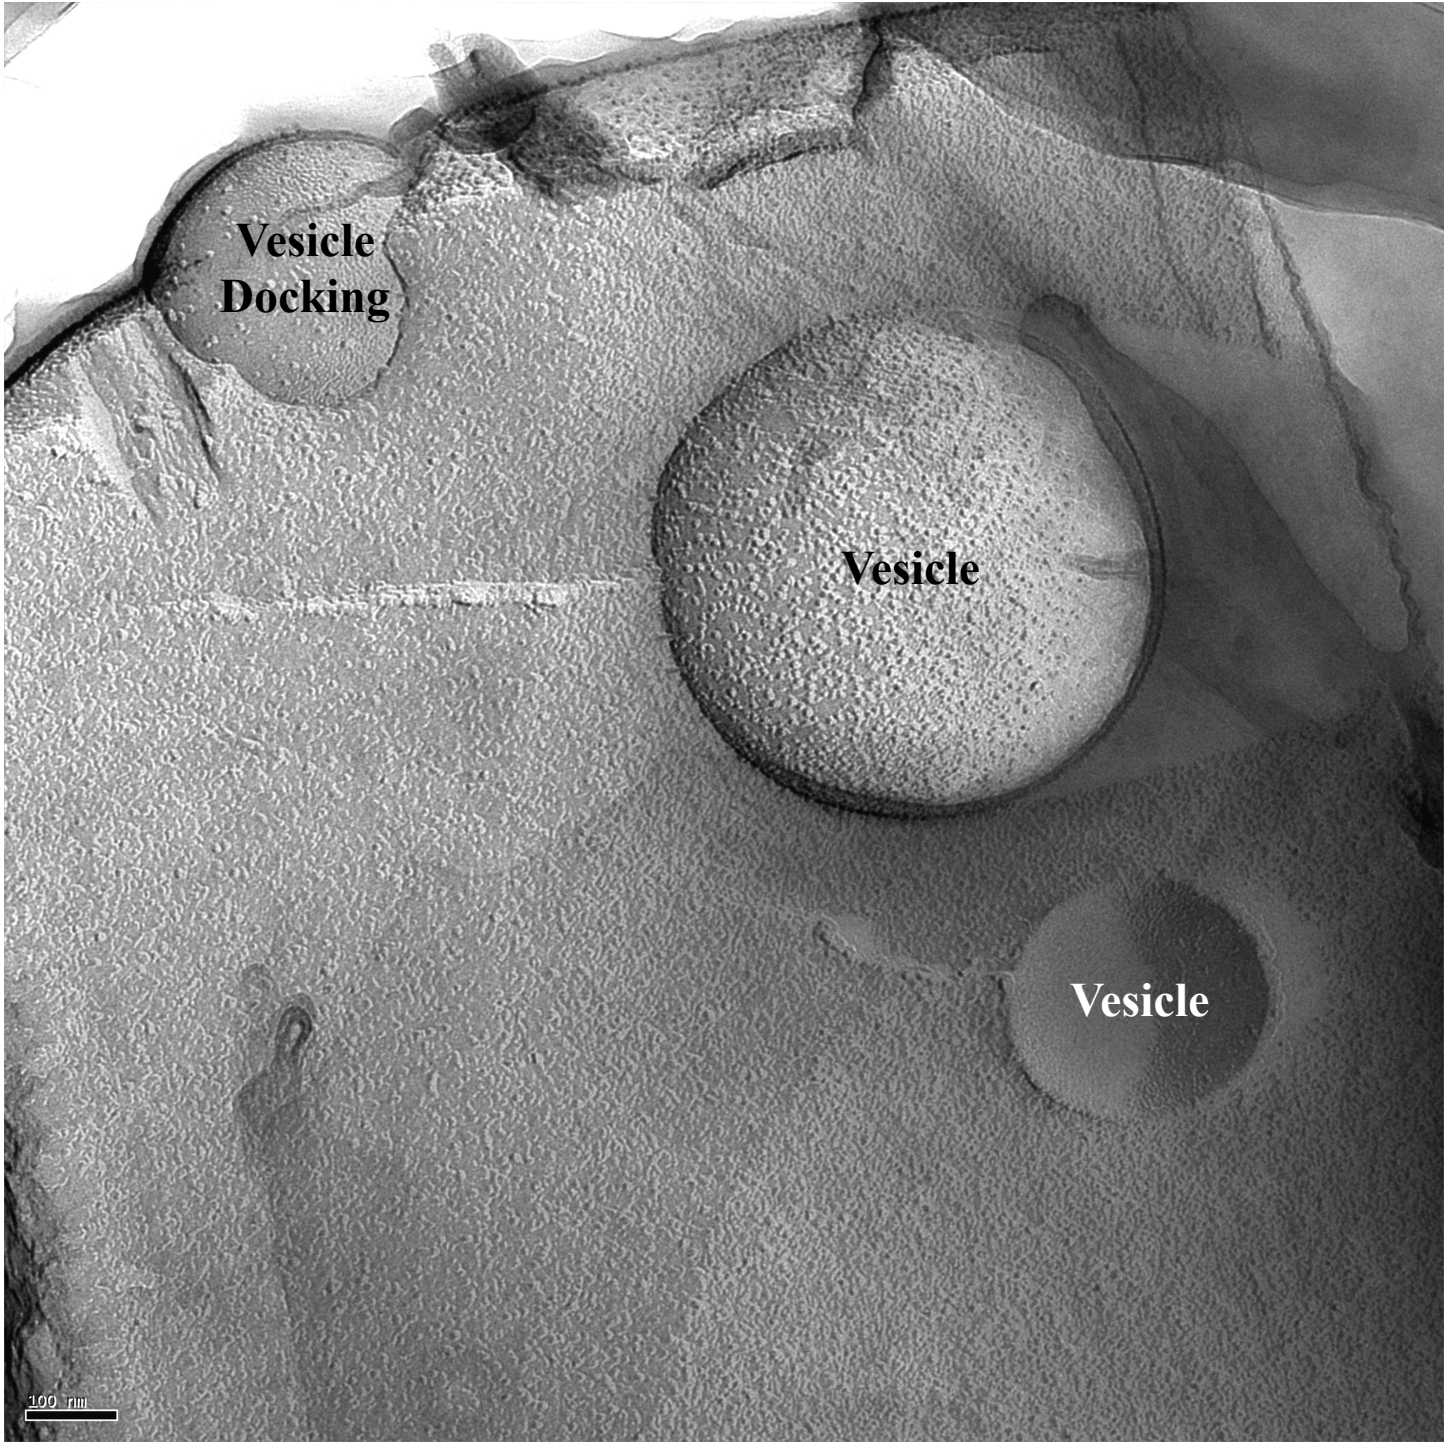

**Vesicle  
Docking**

**Vesicle**

**Vesicle**

100 nm

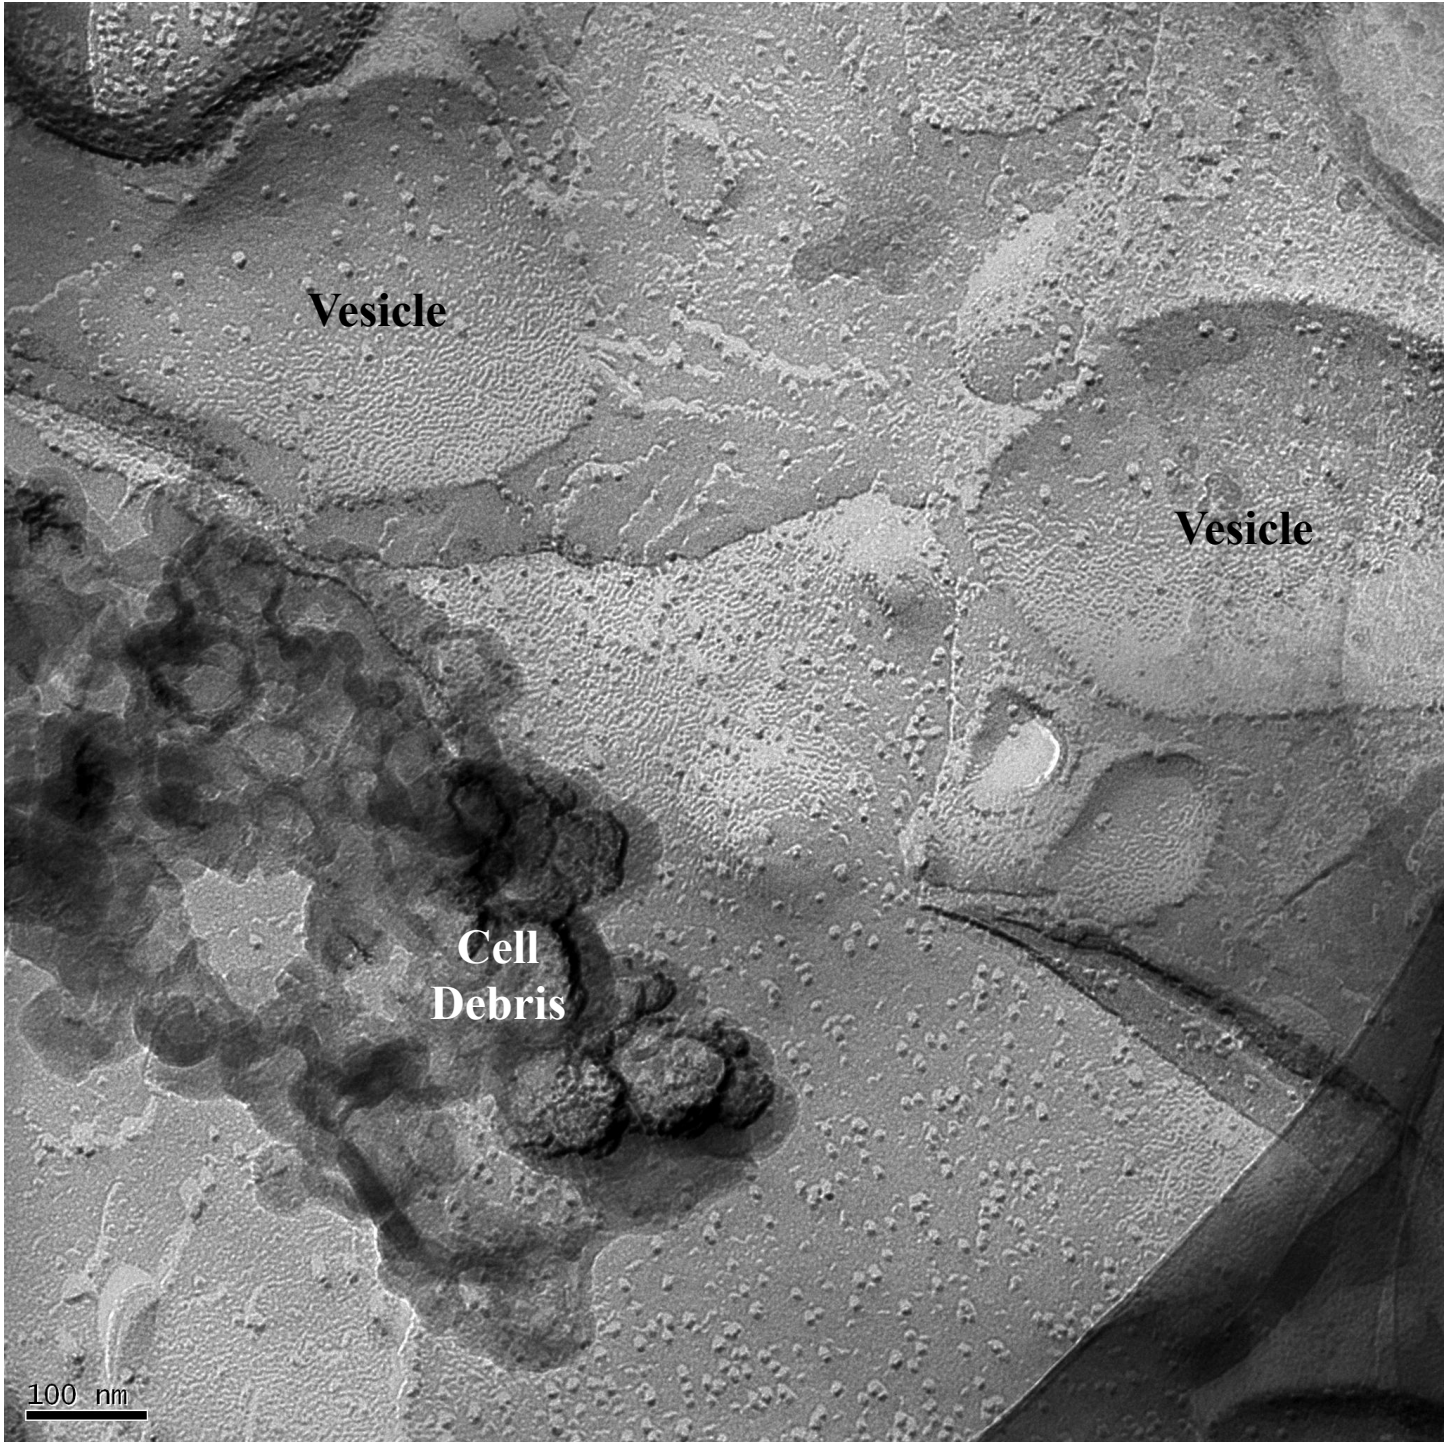

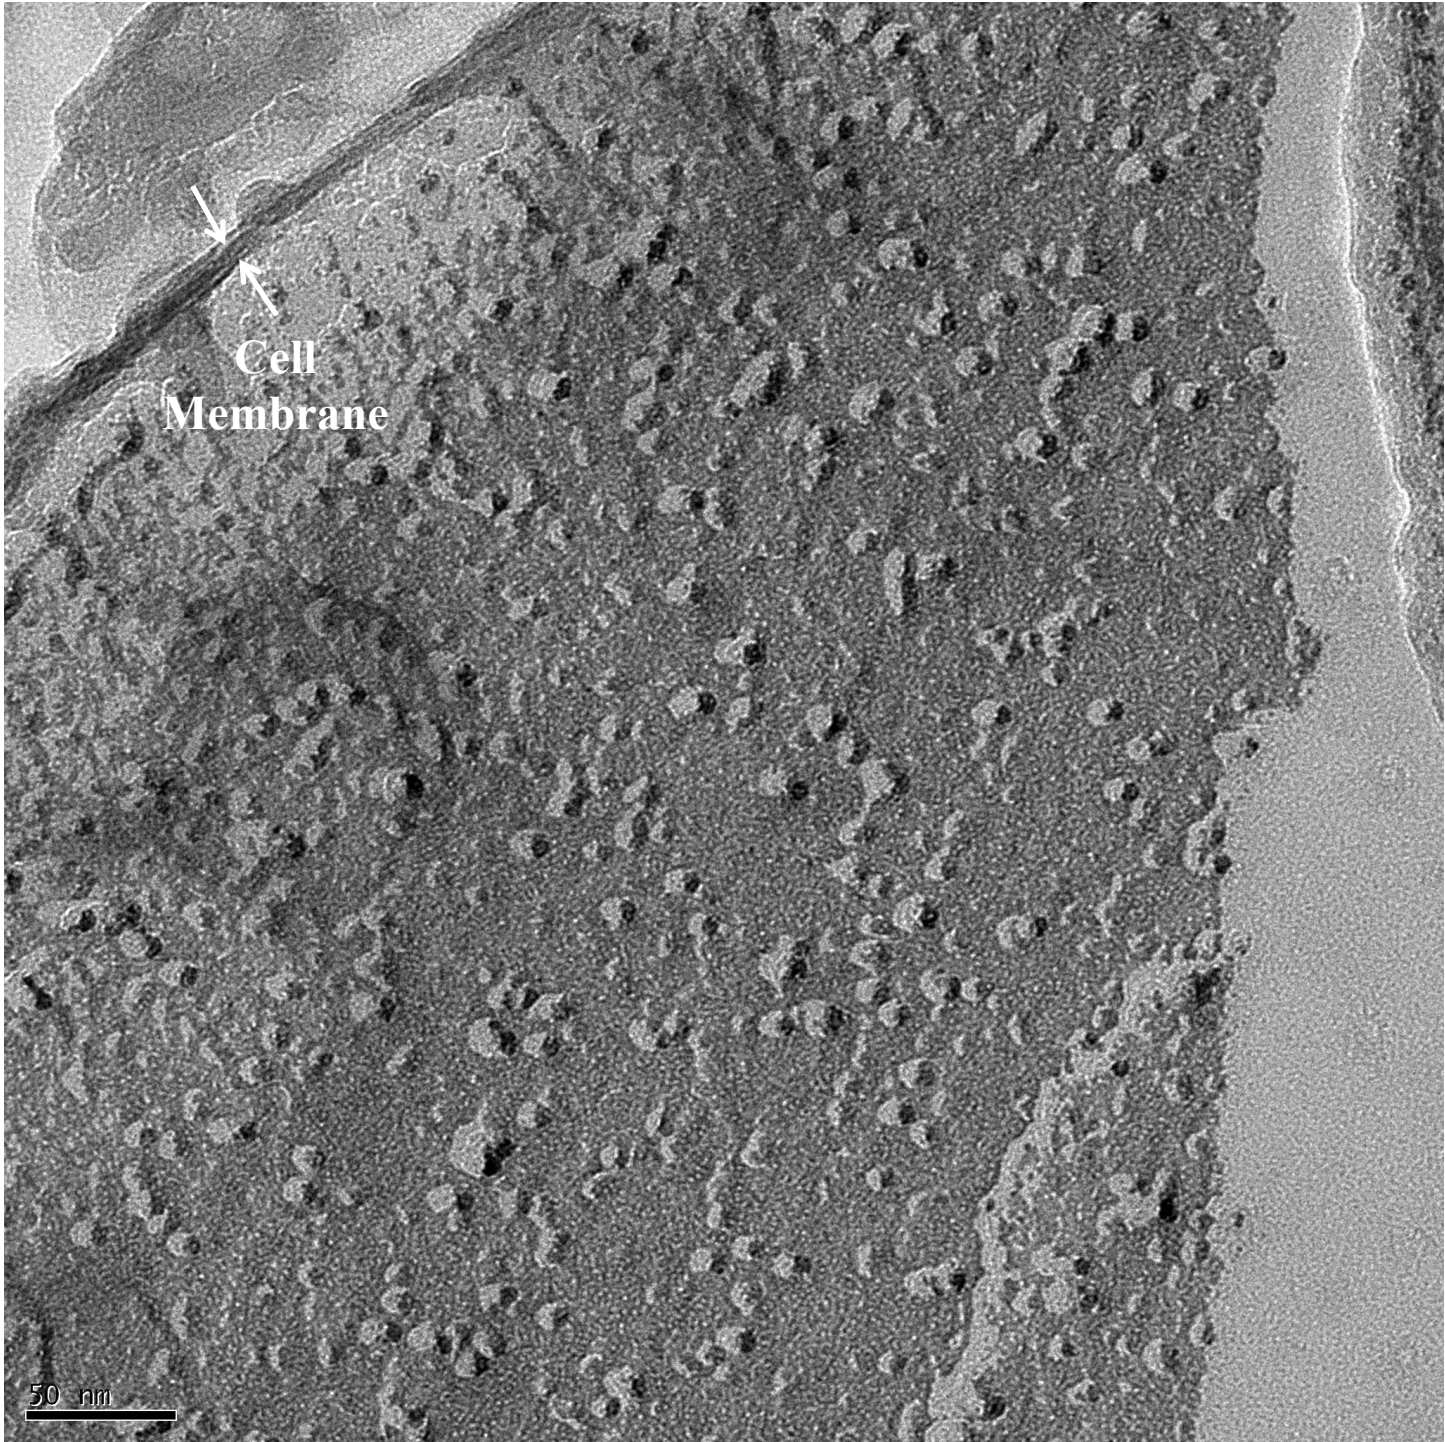

Supplement: srep15982-s1.pdf [file srep15982-s1.pdf]
